# Supplementary material
Source: Copernicus journal article supplement (doi:10.5194/amt-19-2923-2026)
Supplement: Supplementary file 1 [file amt-19-2923-2026-supplement.pdf]

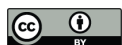

*Supplement of*

## **Evaluating machine learning model performance in a two-step collocation process for TVOC and BTEX sensor calibration**

**Caroline Frischmon et al.**

*Correspondence to:* Caroline Frischmon ([caroline.frischmon@colorado.edu](mailto:caroline.frischmon@colorado.edu))

The copyright of individual parts of the supplement might differ from the article licence.

Table S1. Correlation coefficients before harmonization correction (left column) and after harmonization correction (right column) between the colocation HAQ-Pod and other HAQ-Pods during harmonization

| Sensor             | HAQ-Pod 1   |           | HAQ-Pod 2   |           | HAQ-Pod 3   |           |
|--------------------|-------------|-----------|-------------|-----------|-------------|-----------|
|                    | Uncorrected | Corrected | Uncorrected | Corrected | Uncorrected | Corrected |
| Figaro 2600        | 0.96        | 1         | 0.93        | 1         | 0.99        | 1         |
| Figaro 2602        | 0.97        | 0.98      | 0.93        | 0.98      | 0.99        | 0.99      |
| Figaro 2611        | 0.94        | 0.99      | 0.87        | 0.98      | 0.98        | 0.99      |
| Alphasense NO2 B-4 | 0.95        | 0.96      | 0.99        | 0.99      | 0.95        | 0.96      |
| Temperature        | 0.99        | 0.99      | 1           | 1         | 0.99        | 0.99      |
| Humidity           | 1           | 1         | 1           | 1         | 0.99        | 0.99      |

Table S2. Coefficients ( $\beta$ ) for TGS 2600 linear correction developed during harmonization

| HAQ-Pod | $\beta_0$ (intercept) | $\beta_1$ (TGS 2600) | $\beta_2$ (time elapsed) |
|---------|-----------------------|----------------------|--------------------------|
| 1       | 32.44                 | 1.10                 | -3.15E-06                |
| 2       | 18.89                 | 1.15                 | -3.92E-06                |
| 3       | -22.90                | 0.98                 | 1.07E-06                 |

Table S3. Coefficients ( $\beta$ ) for TGS 2602 linear correction developed during harmonization

| HAQ-Pod | $\beta_0$ (intercept) | $\beta_1$ (TGS 2602) | $\beta_2$ (time elapsed) |
|---------|-----------------------|----------------------|--------------------------|
| 1       | 30.53                 | 0.87                 | -7.97E-07                |
| 2       | 24.11                 | 1.02                 | -2.00E-06                |
| 3       | 29.84                 | 0.77                 | 2.61E-07                 |

Table S4. Coefficients ( $\beta$ ) for TGS 2611 linear correction developed during harmonization

| HAQ-Pod | $\beta_0$ (intercept) | $\beta_1$ (TGS 2611) | $\beta_2$ (time elapsed) |
|---------|-----------------------|----------------------|--------------------------|
| 1       | -6.82                 | 1.12                 | 2.10E-06                 |
| 2       | -13.25                | 1.11                 | 3.11E-06                 |
| 3       | -10.04                | 1.11                 | 9.40E-07                 |

Table S5. Coefficients ( $\beta$ ) for NO<sub>2</sub> B-4 linear correction developed during harmonization

| HAQ-Pod | $\beta_0$ (intercept) | $\beta_1$ (NO <sub>2</sub> B-4) | $\beta_2$ (time elapsed) |
|---------|-----------------------|---------------------------------|--------------------------|
| 1       | -9.84                 | 0.72                            | 2.71E-07                 |
| 2       | 1.51                  | 0.92                            | 2.69E-08                 |
| 3       | -4.03                 | 0.72                            | 1.52E-07                 |

Table S6. Coefficients ( $\beta$ ) for Temperature linear correction developed during harmonization

| HAQ-Pod | $\beta_0$ (intercept) | $\beta_1$ (temperature) | $\beta_2$ (time elapsed) |
|---------|-----------------------|-------------------------|--------------------------|
| 1       | -11.92                | 1.05                    | 2.67E-08                 |
| 2       | 7.55                  | 0.98                    | 6.12E-10                 |
| 3       | 2.91                  | 0.99                    | 4.58E-08                 |

Table S7. Coefficients ( $\beta$ ) for Humidity linear correction developed during harmonization

| HAQ-Pod | $\beta_0$ (intercept) | $\beta_1$ (humidity) | $\beta_2$ (time elapsed) |
|---------|-----------------------|----------------------|--------------------------|
| 1       | -2.50                 | 0.91                 | -3.62E-08                |
| 2       | 1.06                  | 0.97                 | -5.96E-10                |
| 3       | 2.87                  | 0.93                 | -1.78E-07                |

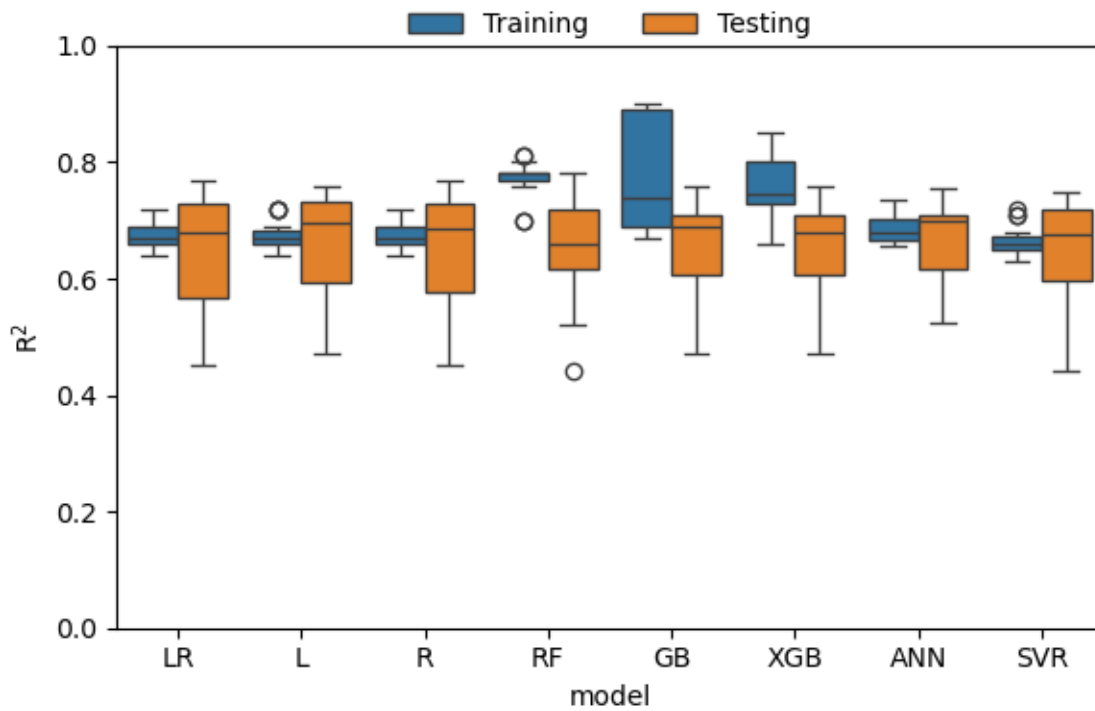

Figure S1.  $R^2$  for the TVOC calibration models

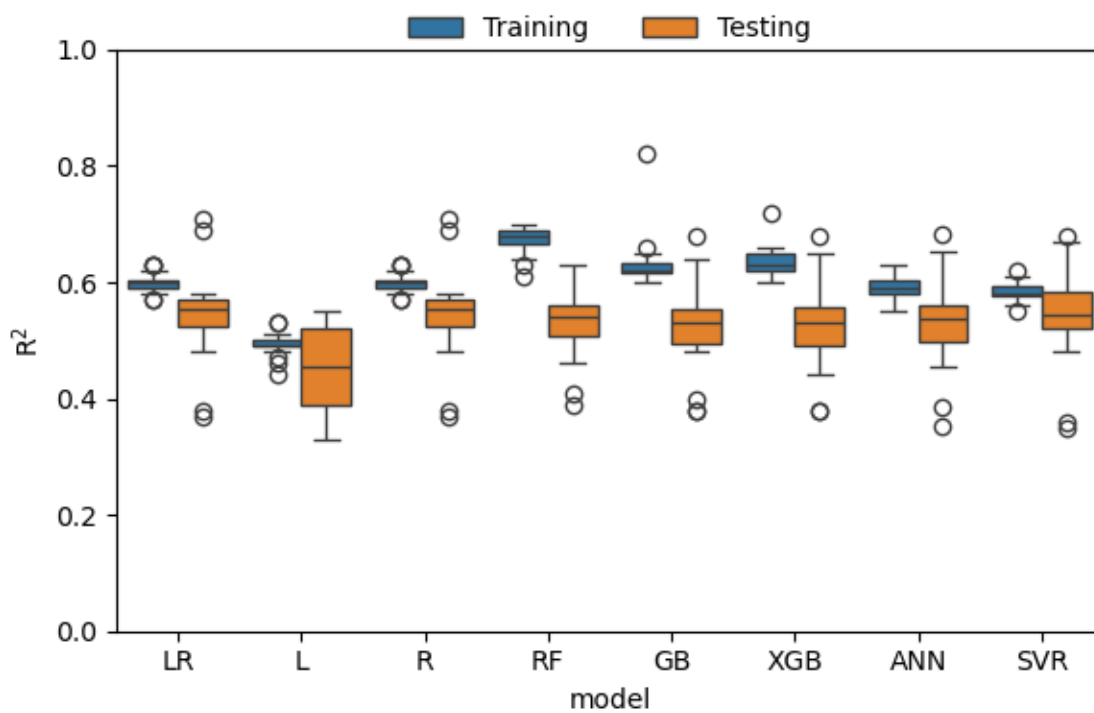

Figure S2.  $R^2$  for the BTEX calibration models

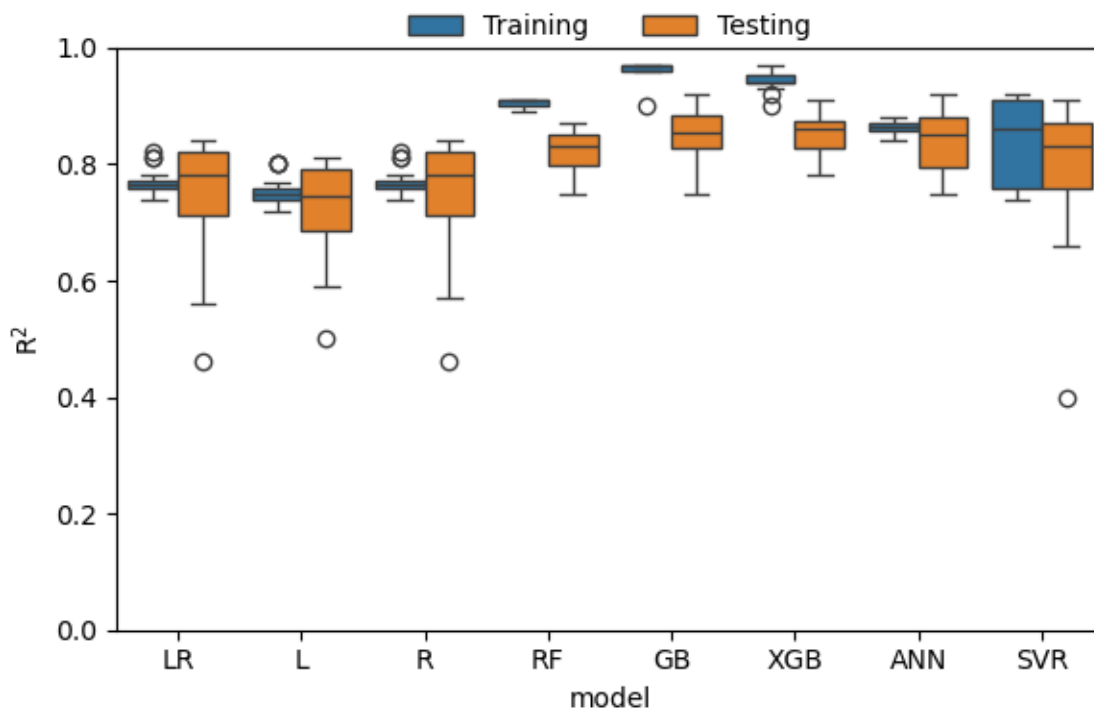

Figure S3.  $R^2$  for the  $\text{NO}_2$  calibration models

Figure S4. Heatmap of correlation coefficients of TVOC field data predictions by model type

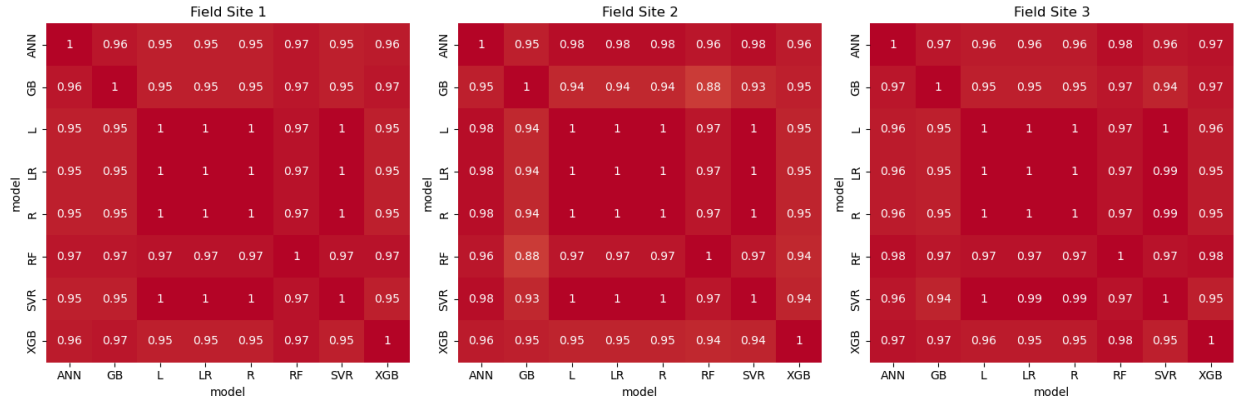

Figure S5. Heatmap of correlation coefficients of BTEX field data predictions by model type

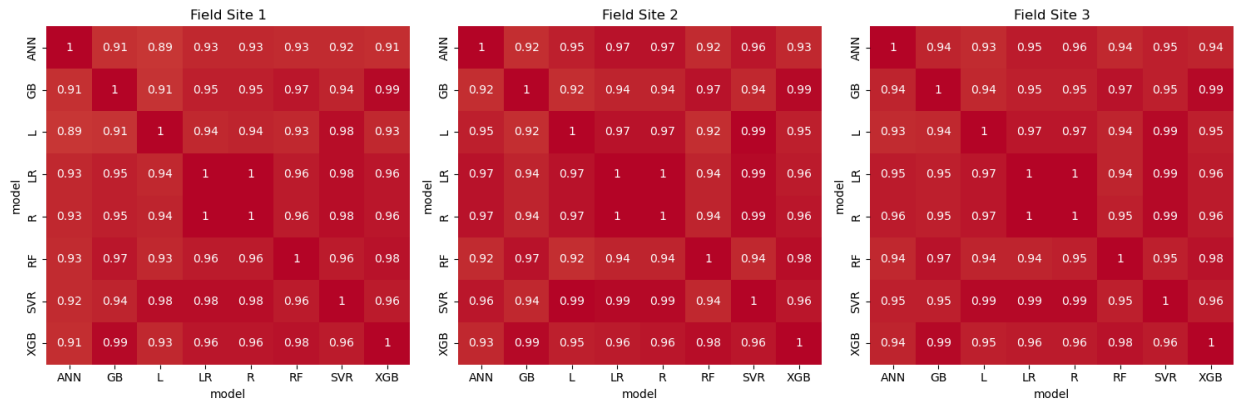

Figure S6. Heatmap of correlation coefficients of NO<sub>2</sub> field data predictions by model type

Field Site 1

| mmodel | ANN  | GB   | L    | LR   | R    | RF   | SVR  | XGB  |
|--------|------|------|------|------|------|------|------|------|
| ANN    | 1    | 0.92 | 0.94 | 0.93 | 0.93 | 0.96 | 0.95 | 0.95 |
| GB     | 0.92 | 1    | 0.85 | 0.85 | 0.85 | 0.93 | 0.94 | 0.97 |
| L      | 0.94 | 0.85 | 1    | 0.99 | 0.99 | 0.92 | 0.87 | 0.89 |
| LR     | 0.93 | 0.85 | 0.99 | 1    | 1    | 0.9  | 0.87 | 0.88 |
| R      | 0.93 | 0.85 | 0.99 | 1    | 1    | 0.9  | 0.87 | 0.88 |
| RF     | 0.96 | 0.93 | 0.92 | 0.9  | 0.9  | 1    | 0.93 | 0.96 |
| SVR    | 0.95 | 0.94 | 0.87 | 0.87 | 0.87 | 0.93 | 1    | 0.95 |
| XGB    | 0.95 | 0.97 | 0.89 | 0.88 | 0.88 | 0.96 | 0.95 | 1    |

model

Field Site 2

| mmodel | ANN  | GB   | L    | LR   | R    | RF   | SVR  | XGB  |
|--------|------|------|------|------|------|------|------|------|
| ANN    | 1    | 0.89 | 0.89 | 0.9  | 0.9  | 0.95 | 0.94 | 0.93 |
| GB     | 0.89 | 1    | 0.73 | 0.76 | 0.76 | 0.91 | 0.93 | 0.96 |
| L      | 0.89 | 0.73 | 1    | 0.99 | 0.99 | 0.85 | 0.78 | 0.8  |
| LR     | 0.9  | 0.76 | 0.99 | 1    | 1    | 0.86 | 0.81 | 0.82 |
| R      | 0.9  | 0.76 | 0.99 | 1    | 1    | 0.86 | 0.81 | 0.82 |
| RF     | 0.95 | 0.91 | 0.85 | 0.86 | 0.86 | 1    | 0.91 | 0.96 |
| SVR    | 0.94 | 0.93 | 0.78 | 0.81 | 0.81 | 0.91 | 1    | 0.94 |
| XGB    | 0.93 | 0.96 | 0.8  | 0.82 | 0.82 | 0.96 | 0.94 | 1    |

model

Field Site 3

| mmodel | ANN  | GB   | L    | LR   | R    | RF   | SVR  | XGB  |
|--------|------|------|------|------|------|------|------|------|
| ANN    | 1    | 0.89 | 0.92 | 0.93 | 0.93 | 0.95 | 0.94 | 0.93 |
| GB     | 0.89 | 1    | 0.8  | 0.82 | 0.82 | 0.91 | 0.93 | 0.96 |
| L      | 0.92 | 0.8  | 1    | 0.99 | 0.99 | 0.88 | 0.83 | 0.84 |
| LR     | 0.93 | 0.82 | 0.99 | 1    | 1    | 0.89 | 0.84 | 0.86 |
| R      | 0.93 | 0.82 | 0.99 | 1    | 1    | 0.89 | 0.84 | 0.86 |
| RF     | 0.95 | 0.91 | 0.88 | 0.89 | 0.89 | 1    | 0.91 | 0.95 |
| SVR    | 0.94 | 0.93 | 0.83 | 0.84 | 0.84 | 0.91 | 1    | 0.93 |
| XGB    | 0.93 | 0.96 | 0.84 | 0.86 | 0.86 | 0.95 | 0.93 | 1    |

model
